1 Evolutionary rescue is determined by differential selection on demographic rates and  
2 density dependence.

3 Anna C Vinton, David A Vasseur, Yale University

4 Keywords: Evolutionary rescue, life history traits, eco-evolution, climate change,  
5 extinction, demography

6 Accelerated rates of climate change are expected to either lead to populations adapting  
7 and persisting, or suffering extinction. Traditionally ecological models make extinction  
8 predictions based on how environmental change alters the intrinsic growth rate ( $r$ ).  
9 However, these often ignore potential for evolutionary rescue, or to avoid extinction via  
10 adaptive evolution. Moreover, the environment may impose selective pressure on specific  
11 demographic rates (birth and death) rather than directly on  $r$  (the difference between the  
12 birth and death rates). Therefore, when we consider the potential for evolutionary rescue,  
13 populations with the same  $r$  can have different abilities to persist amidst environmental  
14 change. We can't adequately understand evolutionary rescue without accounting for  
15 demography, and interactions between density dependence and environmental change.  
16 Using stochastic birth-death population models, we found evolutionary rescue more  
17 likely when environmental change alters birth rather than the death rate. Furthermore,  
18 species that evolve via density dependent selection are less vulnerable to extinction than  
19 species that undergo selection independent of population density. Resolving the key  
20 demographic factors affected by environmental change can lead to an understanding of  
21 how populations evolve to avoid extinction. By incorporating these considerations into  
22 our models we can better predict how species will respond to climate change.

23 **Introduction**

24

25 Environmental change can lead to a decrease in population growth rate, resulting in  
26 extinction in some cases, and persistence in others. The ability of a population to rebound  
27 by attaining a positive growth rate following environmental change is ultimately what  
28 allows it to avoid extinction. The need to understand the mechanisms underlying  
29 population rebound has spurred studies about demographic rescue (via immigration) and  
30 genetic rescue (via an increase in genetic variation) (Brown and Kodric-Brown 1977;  
31 Hufbauer et al. 2015; Whiteley et al. 2015). More recently evolutionary rescue, or  
32 population rebound due to an increase in density of an adaptive genotype, is a potential  
33 mechanism, operating in organisms ranging from microbes (Bell and Gonzalez 2009;  
34 Zhang and Buckling 2011) to insects (Agashe et al. 2011) and mammals (Mills et al.  
35 2018).

36

37 The search for what makes evolutionary rescue probable has led to an increasing effort to  
38 find experimental, empirical and theoretical evidence (Gomulkiewicz and Holt 1995; Orr  
39 and Unckless 2008; Bell and Gonzalez 2009, 2011; Johannesson et al. 2011; Gonzalez et  
40 al. 2013; Lindsey et al. 2013; Martin et al. 2013; Ramsayer et al. 2013; Mills et al. 2018).

41 Four primary factors affect the propensity for evolutionary rescue (Bell and Gonzalez  
42 2009): as initial population size (Ramsayer et al. 2013), genetic variability due to  
43 standing genetic variation and mutations (Orr and Unckless 2008), genetic variability due  
44 to dispersal (Mills et al. 2018), and the extent and severity of environmental change  
45 (Lindsey et al. 2013). Although these results have advanced our understanding of how

46 population growth rate can increase following decline due to environmental change, we  
47 still lack a clear understanding of the role of the underlying demographic rates. This is in  
48 part because there is wide variation in how environmental change alters population  
49 demographic rates (birth and death rates) that is not always explicitly represented in our  
50 model frameworks.

51

52 The environment can reduce population growth rate by decreasing the birth rate,  
53 increasing the death rate, or some combination of the two (Dempster 1983; McCreddie et  
54 al. 1983; Aanes et al. 2000; Sibly et al. 2000, 2005; Clutton-Brock and Coulson 2002;  
55 Crump et al. 2004; Brewer and Peltzer 2009). To generalize across taxa, previous studies  
56 investigating evolutionary rescue commonly model demographic rates using  
57 deterministic models that do not differentiate how the environment acts on the birth and  
58 death rates, but rather use a fixed parameter, the intrinsic rate of population increase,  $r$   
59 (the difference between the birth rate and the death rate). Consequently, information  
60 about changes in a particular demographic rate can be lost if  $r$  is the focus of a study.

61

62 Populations with the same  $r$ , but different underlying demographic rates, may respond  
63 quite differently to environmental selection, affecting how quickly and effectively they  
64 adapt (Holt 1990). Take the case of two populations, where one has a high birth and death  
65 rate, while another has a low birth and death rate. If the difference between the two rates  
66 is equal, both populations will have the same  $r$ . But, all else held equal, the population  
67 with the higher birth and death rate will have a faster rate of population turnover, and will  
68 evolve in response to selection more quickly than the population with the low birth and

69 death rate. A logistic or exponential growth model that depends on a single  $r$  value,  
70 doesn't allow exploration of how selection and environment affect birth and death rates,  
71 and ultimately population extinction or persistence. Therefore, treating birth and death  
72 rates explicitly can give insight into which natural populations are more likely to persist  
73 via evolutionary rescue in the face of environmental change. So, the potential for  
74 successful evolutionary rescue of small populations depends explicitly on birth and death  
75 rates, not  $r$ , which abstracts away from these rates and obscures the actual speed of  
76 adaptation by ignoring the rate of population turnover.

77

78 Density dependence can also affect birth and death rates, and has been shown to influence  
79 the dynamics of many species (Sibly et al. 2000; Coulson et al. 2001; Reed and Slade 2008;  
80 Ouyang et al. 2014). Environmental change may or may not alter the strength of density  
81 dependence; this varies across taxa and type of change (Owen-smith 1990; Sibly et al.  
82 2000; Coulson et al. 2001). For example, environmental change leading to a drought may  
83 decrease the availability or accessibility of resources (Owen-smith 1990), intensifying  
84 density dependence as individuals compete for water-limited resources. Theoretical studies  
85 predict that compensatory density dependence, or decrease in growth rate at high densities  
86 and increase at low densities, would allow for a larger population size following  
87 environmental change (Holt 1990; Ferguson and Ponciano 2015), further facilitating  
88 adaptation to new environments. Therefore, establishing the interaction between density  
89 dependence and environmental change in different demographic rates is of the utmost  
90 importance as the population size following an environmental perturbation determines the  
91 probability of extinction.

92 In the past, determining how the environment alters demographic rates in a way that is  
93 the most mathematically simple has been sufficient, but, we argue is no longer sufficient  
94 when our interest turns to persistence via evolutionary rescue. Therefore, initial studies of  
95 evolutionary rescue focusing on  $r$  for simplicity, need to be expanded because: (i) they  
96 underlying demographic parameters, and (ii) the interaction between environmental  
97 change and density dependence may strongly affect evolution. We investigate how the  
98 evolutionary rescue depends in detailed ways on how environmental change affects  
99 population demographic rates. Here we incorporate environmental conditions and their  
100 effects on density dependence into per-capita rates of birth and death, to elucidate their  
101 effect on population dynamics and persistence in a stochastic model. We find that  
102 populations where the environment affects their death rate as opposed to their birth rate  
103 are the most vulnerable to extinction. Furthermore, when environmental change  
104 intensifies density dependence, populations are better able to rebound from small  
105 population sizes and undergo evolutionary rescue.

106

## 107 **Methods**

### 108 *Model Formulation*

109 We construct a continuous-time individual-based logistic growth model, then consider four  
110 ways that environmental change might alter population demographic rates. In all cases, as  
111 these are logistic growth models, either the birth or death rate is density dependent. In  
112 Cases 1a and 1b, the environment alters the birth rate in a density independent and density  
113 dependent manner respectively. In Cases 2a and 2b, the environment alters the death rate  
114 similarly, in a density independent, and density dependent way. We pay particular attention

115 to ensuring that the four cases converge on the same outcome when the environment is  
116 static, to best isolate the effects of life-history and selection on evolutionary rescue.

117

118 *Logistic growth*

119 All of our model cases are rooted in the logistic growth equation where  $g(N)$  is a function  
120 describing the density dependence of the per-capita growth rate. Note that  $g(N) = r$  in the  
121 case of exponential growth, as there is no density dependence. We begin with a general  
122 equation for the rate of population growth,

123

124 
$$\frac{dN}{dt} = g(N)N \quad (0.1)$$

125 .

126 Since  $g(N)$  is equal to the difference between the per capita birth rate  $b$  and the per capita  
127 death rate  $d$ , we can rewrite equation (0.1) as the difference between birth and death rate,

128

129 
$$\frac{dN}{Ndt} = b(\gamma_0, \gamma_1) - d(\gamma_0, \gamma_1) \quad (0.2)$$

130

131 given that both birth and death are governed by density-independent  $\gamma_0$ , and density-  
132 dependent  $\gamma_1$  contributions. Consistent with most derivations of logistic growth (Nåsell  
133 1996, 2001), we assume that density-dependent factors tend to reduce birth rates and  
134 increase death rates, leading to the following general definition for birth and death rate  
135 functions:

136 
$$b(\gamma_0, \gamma_1) = b_0 - \gamma_0 - \gamma_1 \left( \frac{b_0 - d_0}{K_A} \right) \quad (0.3)$$

137

138 
$$d(\gamma_0, \gamma_1) = d_0 + \gamma_0 + \gamma_1 \left( \frac{b_0 - d_0}{K_A} \right) \quad (0.4)$$

139

140 Where  $b_0, d_0$  represents a modification of the background density-independent birth and  
141 death rates and  $K_A$  is the maximum carrying capacity.

142

143 *Environmental effect*

144 We allow different demographic rates to depend on the environment and traits of  
145 individuals. For simplicity and tractability we model the environment  $\mu_0$  as a simple  
146 sinusoidal function of time (see discussion for our reasons for this choice)

147

148 
$$\mu_0(t, f) = \cos(2\pi ft) \quad (0.5)$$

149

150 where  $f$  is frequency. We allow individuals to exhibit varied responses to the environment  
151 depending on their trait value  $\mu$ . The effect of the environment, modulated by the trait, is  
152 given by

153 
$$\varepsilon_\mu = |\mu - \mu_0(t, f)| \quad (0.6)$$

154

155 where a large  $\varepsilon_\mu$  represents a maladapted individual, and a small  $\varepsilon_\mu$  represents a well-  
156 adapted individual. We systematically incorporate the environmental effect  $\varepsilon_\mu$  into the  
157 density independent  $\gamma_0$  and density dependent  $\gamma_1$  components of the birth  
158 and death rates. However, to facilitate comparison among the model cases, we scale our  
159 equations so that for any value of  $\varepsilon_\mu$ , the equilibrium population size (assuming no  
160 temporal environmental change) is the same across all of the model cases. This allows us  
161 to make an exact comparison of the impact of temporal environmental change on  
162 population dynamics, mediated by ecology and evolution. We do this by assuming that  $K_A$   
163 represents the carrying capacity when an entire population is perfectly-adapted to their  
164 environment ( $\varepsilon_\mu = 0$ ) and we introduce a second carrying capacity,  $K_B$  for a population  
165 that is maladapted to their environment ( $\varepsilon_\mu = 2$ ). We then independently solve the  
166 parameters  $\gamma_0$  and  $\gamma_1$  given the conditions for carrying capacity. When the environment  
167 enters via a density-independent route (Cases 1a, 2a), we find:

168

169 
$$\gamma_0 = \frac{K_B - K_A}{2K_A} \varepsilon_\mu \quad (0.7)$$

170

171 and  $\gamma_1$  for the models where the density dependence is altered by environmental change  
172 (Cases 1b, 2b)

173 
$$\gamma_1 = \left( 1 + \frac{K_B - K_A}{2} \varepsilon_\mu \right)^{-1} \quad (0.8)$$

174



175 *Cases 1a-1b, dynamic birth models*

176 We begin with Case 1a, where the environment alters  $b(\gamma_0, \gamma_1)$  in a density independent  
 177 way as shown in Figure 1a. For case 1b, the environment again alters  $b(\gamma_0, \gamma_1)$  but in this  
 178 case, it alters population response to density as shown in Figure 1b. For both dynamic birth  
 179 models we hold  $d(\gamma_0, \gamma_1)$  constant and equal to  $d_0$ .

180

181 *Case 2a-2b, dynamic death models*

182 In Case 2a we now incorporate the environmental effect into  $d(\gamma_0, \gamma_1)$  in a density  
 183 independent way as shown in Figure 1c. In Case 2b, as in Case 2a, the environment alters  
 184  $d(\gamma_0, \gamma_1)$ , but now alters population response to density as shown in Figure 1d. In both  
 185 cases holding  $b(\gamma_0, \gamma_1)$  constant.

186

187 This yields the four model cases described above and laid out in Table 1.

188

| Environment enters via: | Density Independent |                                 | Density Dependent |                                   |
|-------------------------|---------------------|---------------------------------|-------------------|-----------------------------------|
| Birth                   | Case 1a             | $b(\gamma_0, N(t))$<br>$d(0,0)$ | Case 1b           | $b(0, \gamma_1 N(t))$<br>$d(0,0)$ |
| Death                   | Case 2a             | $b(0,0)$<br>$d(\gamma_0, N(t))$ | Case 2b           | $b(0,0)$<br>$d(0, \gamma_1 N(t))$ |

189

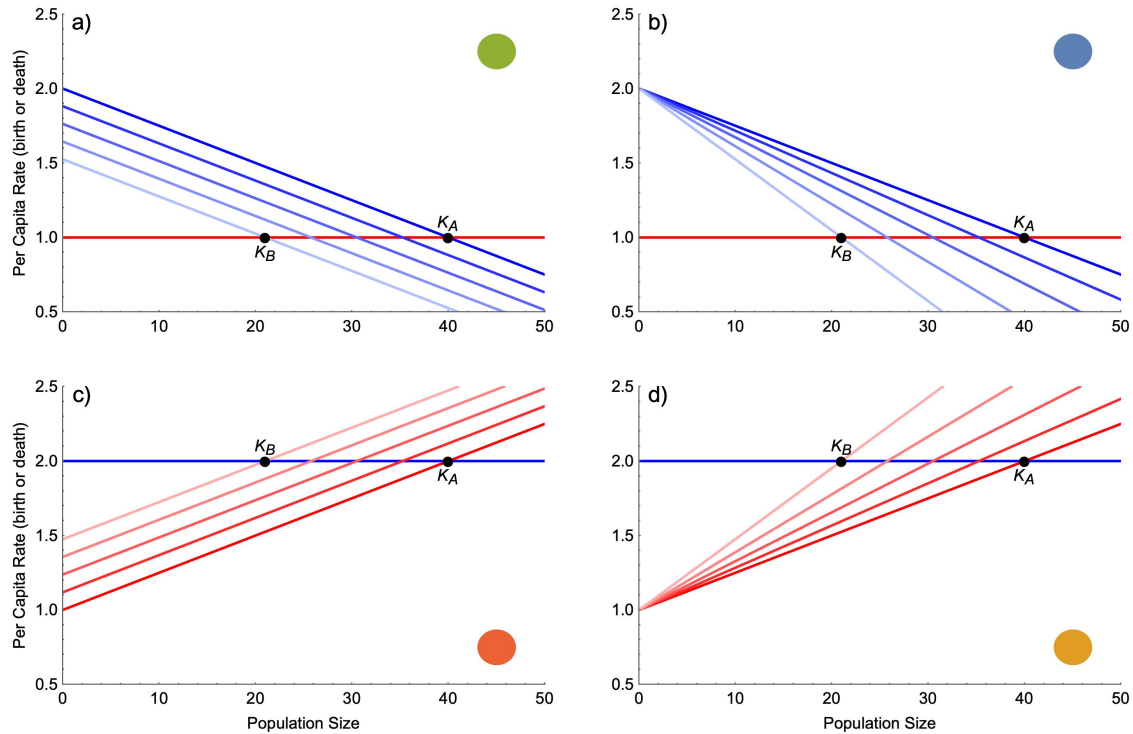

190

191 **Figures 1 a-d.** All four cases yield logistic population growth, but depend on different  
192 relationships between per-capita demographic rates of birth (blue) and death (red), (see  
193 equations 1.3 and 1.4, and table 1). In the upper panels (cases 1a, 1b) death rate is constant,  
194 birth rate is density dependent, and the environment either directly increases or decreases  
195 birth rate (1a) or changes the strength of the relationship between density and birth rate  
196 (i.e., density dependence) (1b). Each blue line depicts the rate of birth for a particular state  
197 of adaptation to the environment, ranging from perfectly adapted  $\varepsilon_\mu = 0$ , as dark blue (top  
198 line), to strongly maladapted  $\varepsilon_\mu = 2$ , as light blue (bottom line). The lower panels show  
199 the same relationships for cases 2a and 2b. Colored disks show how the 4 scenarios match  
200 to figures 3 and 4.

201

202

203 *Stochastic framework*

204 We used the above ordinary differential equation framework to develop a stochastic  
205 simulation algorithm (SSA or birth-death process) using the direct method described by  
206 (Gillespie 1977), adapted to allow heritable variation in individual traits. Stochasticity  
207 occurs in the model as a result of the random selection of birth and death events  
208 (demographic stochasticity), and random mutations during reproduction. This framework  
209 is apt for testing our assumptions because true extinctions are possible, and evolution  
210 occurs as a result of heritable individual variation that emerges from our assumptions about  
211 population demography.

212

213 We initialize the model with 35 individuals with traits drawn from a uniform distribution  
214 ranging from -1 to 1, the same range as the possible environmental values. Integration of  
215 the model starts by first determining the time until the next event, which is randomly  
216 sampled from an exponential distribution with mean  $1/E$ , where  $E$  is the sum of all possible  
217 events (birth or death of each individual):

218

219 
$$E = \sum_i b(\mu_i) + \sum_i d(\mu_i) \quad (0.9)$$

220

221 After the current time  $t$  is updated, the specific event that occurs is determined by randomly  
222 choosing among all possible events, weighted according to differences in their rates. For  
223 example, the probability that the next event is a death of the  $i$ th individual is  $d(\mu_i)/E$ . If  
224 an individual dies, it is removed from the population and the entire process is repeated. If  
225 an individual reproduces, a random variable on a uniform (0,1) distribution is chosen. If

226 this value is greater than 0.01, the offspring is assigned the parent's trait value; otherwise,  
227 the offspring is given a trait value that is equal to the parent trait value plus a mutation  
228 value randomly drawn from a range of -0.3 to 0.3. This sequence of steps mimics mutation-  
229 limited evolution in an asexual population. A similar eco-evolutionary framework is  
230 described in Delong & Gilbert 2016; however their approach differs slightly from ours  
231 because they first aggregate rates of birth and death to the population level, and then  
232 randomly assign the individual to experience the event. This results in an underestimate in  
233 the response to selection, but leads still to the same equilibrium.

234

### 235 *Simulations*

236 We conducted simulations across a log-linear range of frequencies ( $f$ ) of environmental  
237 change. For each frequency of environmental change, we conducted 512 independent  
238 replicate simulations. We ran the model for 500 time steps before recording the trait values  
239 of each individual, as well as the population size and all simulations continued for another  
240 10000 time steps or until extinction occurred. Trait-environment correlations were  
241 computed for the mean phenotype and environment value using Pearson correlation  
242 coefficients. To provide a basis of comparison, we also conducted simulations where  
243 mutation driven evolution did not occur.

244

245 Lastly, we conducted simulations utilizing an environment that changes in a logistic  
246 manner

$$247 \quad \mu_0(t) = \mu(0)_0 + \frac{\mu(1)_0}{2} \left( 1 + \frac{t - T_p}{\sqrt{a + (t - T_p)^2}} \right) \quad (0.10)$$

248 where  $\mu_0$  is -1,  $\mu_1$  is 1,  $a$  is 800 and  $T_p$  or the time at which the environment changes is  
249 600. The slope of the environmental change is determined by  $a$ , which we chose to be a  
250 similar slope of change to our sinusoidal environment  $f = 0.015$ . We used this additional  
251 case to showcase a more traditional type of environmental change to observe evolutionary  
252 rescue. Simulations were conducted using Wolfram *Mathematica* v11.0 on a iMac Pro with  
253 18 Xeon W cores.

254

## 255 **Results/Discussion**

256

257 Our results show that evolutionary rescue is affected when the environment influences  
258 different demographic rates and processes. We begin by discussing the resulting extinction  
259 dynamics when considering populations that cannot undergo evolution, followed by  
260 populations that have the capacity for mutation driven evolution. The four models we  
261 consider here are calibrated to produce the same behavior when the environment is held  
262 constant; the population will approach an equilibrium density that is determined by the  
263 environment, but is consistent across all cases. At equilibrium, however, the turnover rates  
264 (approximated by  $\frac{b}{d}$ ) differ among the models in which birth rates vary amongst  
265 individuals and those in which death rates vary (see figure 1). Consistent differences also  
266 emerge among the models incorporating the density independent and density dependent  
267 environmental interaction; particularly at low densities, the effect of trait variation is  
268 strongly buffered in the latter cases. These differences give rise to the results depicted in  
269 figure 2.

270 *Demographic results without evolution*

271 The four models exhibit a consistent ranking of mean persistence time across the entire  
272 range of frequencies of environmental change we considered. Mean persistence was greater  
273 in populations whose birth rates (rather than death rates) were environmentally influenced,  
274 and when the environment affected the strength of density dependence. In the absence of  
275 evolution, the most persistent populations were of the form outlined in case 1b, followed  
276 by case 1a, where there is a density-environment interaction in the birth rate and where the  
277 environment acts on the birth rate independent of density respectively. These were  
278 followed by case 2b then 2a the populations where the environment altered the strength of  
279 density dependence and acted independent of density on the death rate. This ranking in  
280 persistence is easily explained by the ecological differences among the models, considering  
281 in particular their behavior when population sizes are small (i.e., as populations are near  
282 extinction).

283

284 First, populations with birth as the responsive trait persist longer than those with death as  
285 the responsive trait due to the greater demographic stochasticity in death models which  
286 increases extinction at small pop sizes. The intrinsic growth rate of the population is  
287 determined by the difference between the birth and death rate, while demographic  
288 stochasticity is determined by the sum of the birth and death rate (Nisbet and Gurney 2003;  
289 Palamara et al. 2016). Although our models are parameterized so that they have the same  
290  $K_A$  and  $K_B$  for when  $b - d = 0$ , the sum of  $b$  and  $d$  at these equilibrium points is four  
291 times higher in the death models (Case 2a and 2b). Hence the death models have much  
292 higher demographic stochasticity than the birth models (Figure 1), and it is clear that

293 demographic stochasticity increases extinction probability at low population sizes (Lande  
294 1993; Melbourne and Hastings 2008). Furthermore, demographic stochasticity increases  
295 the variance in population size, as we see in figure 2 (a,b). High fluctuations in vital rates  
296 has been shown to decrease population growth due to an increase in variation in the  
297 population growth rate (May 1973; Jonsson and Wennergren 2019). Accordingly, various  
298 species have been shown to be particularly vulnerable to highly variable adult survival,  
299 leading to a higher extinction risk (Lande 1988; Caswell et al. 1999; Jonsson and Ebenman  
300 2001).

301

302 Secondly, at low densities, models where the environment interacts with the strength of  
303 density dependence maintain higher average (and less variable) population size since  
304 maladaptation to the environment has a diminishing impact as population size declines (Fig  
305 1b, 1d). This is reasonable as populations with highly variable growth rates have been  
306 shown to be particularly vulnerable to extinction (Leigh 1981; Lande and Orzack 1988).  
307 Furthermore it has been shown with a discrete time model that when the environment is a  
308 density dependent term it produces a multiplicative effect on population size, and these  
309 populations have more strongly bounded populations (Ferguson and Ponciano 2015). As  
310 shown in figure 1 (b and d), at low population sizes the density dependent environmental  
311 effect has lower variation than the density independent environmental effect, while the  
312 opposite is the case at large population sizes. These differences in variation translate into  
313 longer persistence times of the models where environmental change alters the affect of  
314 density (case 1b, 2b) relative to those where environmental change alters the vital rates  
315 independent of density (case 1a, 2a). Although the environmental density effect increases

316 variation at high population sizes, it is favorable when populations are small as they are  
317 better able to rebound.

318

319 All four scenarios exhibit a rising persistence time as the frequency of environmental  
320 variation increases. This is driven by a phenomenon known as “ecological tracking”; when  
321 a population ecologically tracks its environment, changes in the environment are re-  
322 expressed in the population dynamics as correlated changes in density. Here, where the  
323 environment changes sinusoidally, ecological tracking generates population dynamics that  
324 exhibit a noisy cycle at the same frequency as the environment (figure 3a,c); however, the  
325 tracking response of population diminishes as  $f$  increases. (May 1976) suggested that the  
326 quantity, which represents the system’s dominant eigenvalue, represents a threshold  
327 frequency above which tracking does not occur in the Logistic model, but the exact  
328 relationship between tracking and the frequency of oscillations is best described as a  
329 continuous sigmoid function (Vasseur 2007). The stronger tracking response generated at  
330 low frequencies of environmental variation leads to greater variation in population density  
331 (both above and below the mean) and thus greater extinction risk. This effect has been  
332 shown for a variety of ecological scenarios (Heino et al. 2000; Schwager et al. 2006).

333

#### 334 *Demographic results with evolution*

335 When the full eco-evolutionary dynamics are present in our models, we find that the  
336 persistence ranking of models is maintained, however all four models demonstrate a U-  
337 shaped (rather than monotonic) relationship between the frequency of environmental  
338 change and mean persistence times. This U-shaped relationship arises due to the interplay



339 between ecological and evolutionary tracking of the changing environment. Evolutionary  
340 tracking occurs when changes in the environment are slow enough that they can be re-  
341 expressed as correlated changes in the mean or modal trait value(s) of the population.  
342 Importantly, evolutionary and ecological tracking are interdependent, here forming a link  
343 between ecology and evolution. As evolutionary tracking strengthens, ecological tracking  
344 is diminished because a population that adapts quickly does not experience the same extent  
345 of variation in its vital rates and parameters (here  $r$  and  $K$ ) (See figure 3b,d). As ecological  
346 tracking generally has a negative effect on persistence, evolutionary tracking generates a  
347 benefit mitigating the population's response to ecological tracking. Given the assumptions  
348 of our model (mutations per birth, mutation effect size, and population size) evolutionary  
349 tracking occurs beginning at approximately  $f = 0.005$ . Here it can be seen that the  
350 deviation between traits and the environmental optimum tends to decline at low frequencies  
351 (figure 2d), leading to an increase in the population size and mean persistence times.  
352 Together the evolutionary and ecological tracking lead to the U-shaped response to  
353 frequency. Variation in population size is not only caused by variation of demographic  
354 stochasticity between different vital rates, but also by intraspecific trait variation. Since  
355 any individual can give birth in dynamic death models, they have more trait variation in  
356 the autocorrelated environments, (low  $f$ ) which increases the effect of maladaptation on  
357 their death rate. But as the  $f$  increases the effect of maladaptation becomes the same across  
358 the models.

359

360 The eco-evolutionary dynamic that is responsible for an increase in persistence times at  
361 low frequencies of environmental fluctuation, also leads to a reduction in persistence time

362 at intermediate and high frequencies (Figure 4). This reduction is due to mutational loading  
363 (Higgins and Lynch 2001) which is here exacerbated by the fact that mutations which  
364 might be immediately favorable in the population become quickly deleterious as the  
365 environment oscillates. This confounding kind of evolution is most likely to occur at  
366 intermediate frequencies, where complete evolutionary tracking is unlikely, but random  
367 chance allows momentary “misleading” evolutionary changes to occur. We see a slight  
368 inflation of the mean and range of maladaptation in our eco-evolutionary models (figure  
369 2c) relative to those without evolution, reinforcing this mechanism. All of our models  
370 transition from a detrimental, to a beneficial effect of the eco-evolutionary dynamic near  
371  $f = 0.005$ . Determining how this threshold relates to the life-history parameters of natural  
372 populations will provide important information about the potential for evolution to buffer  
373 populations from extinction in oscillating environments. Note that in Figure 2c, the mean  
374 line is slightly decreased at low  $f$  for the death models. This is due to the higher trait  
375 variation exhibited in these models as previously discussed, causing a larger deviation from  
376 the optimal trait condition.

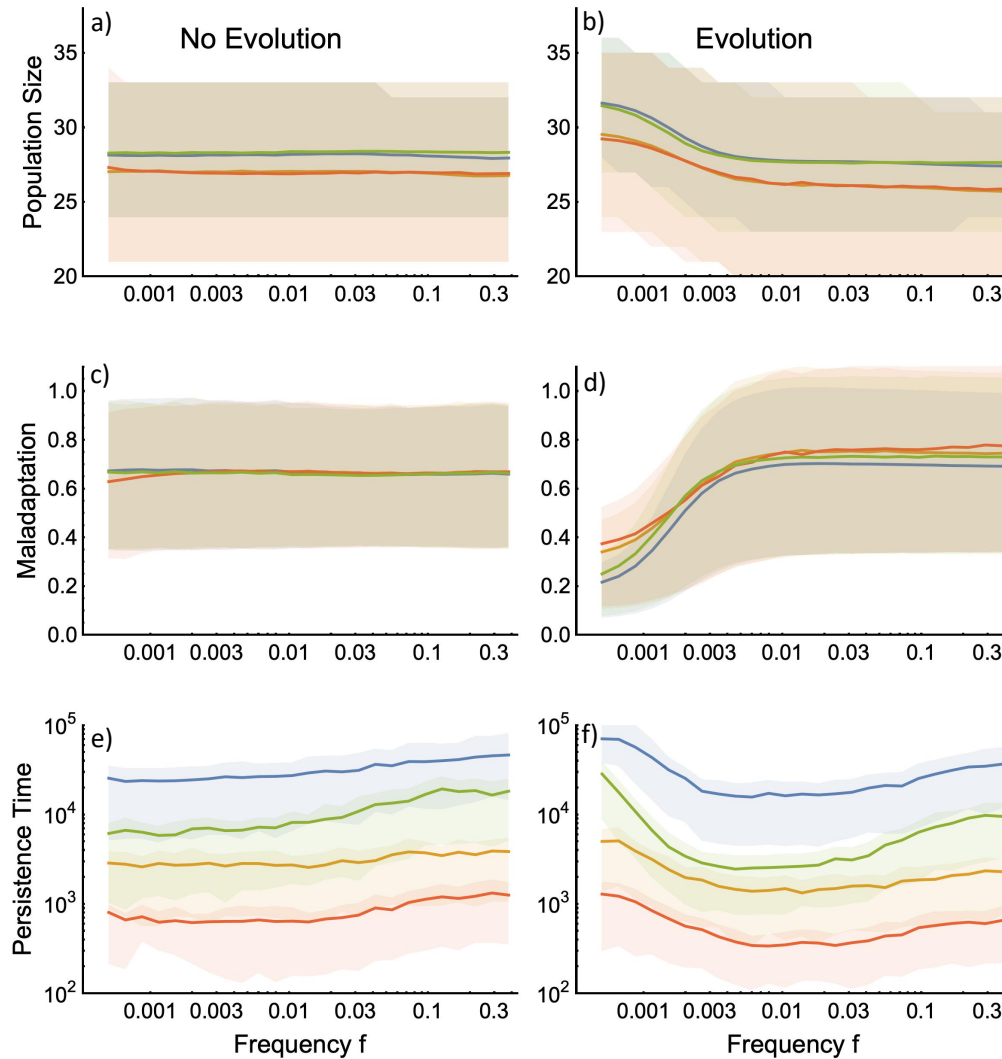

377

378 Figure 2. Population dynamics of the four model cases without and with a complete  
379 evolutionary dynamic. For population size (a,b) and maladaptation (c,d), the solid lines  
380 give the ensemble means of all model replicates and times and the shaded areas show the  
381 25<sup>th</sup> and 75<sup>th</sup> percentiles of the distribution. For persistence time (e,f), the solid lines give  
382 the means across model replicates and the shaded areas show the 25<sup>th</sup> and 75<sup>th</sup> percentiles  
383 of the distribution. Maladaptation is measured as the difference between the mean  
384 population trait and the environmental value. The blue line represents case 1b, the green  
385 line case 1a, the orange line case 2b, and the red line case 2a, as shown in Figure 1.

386

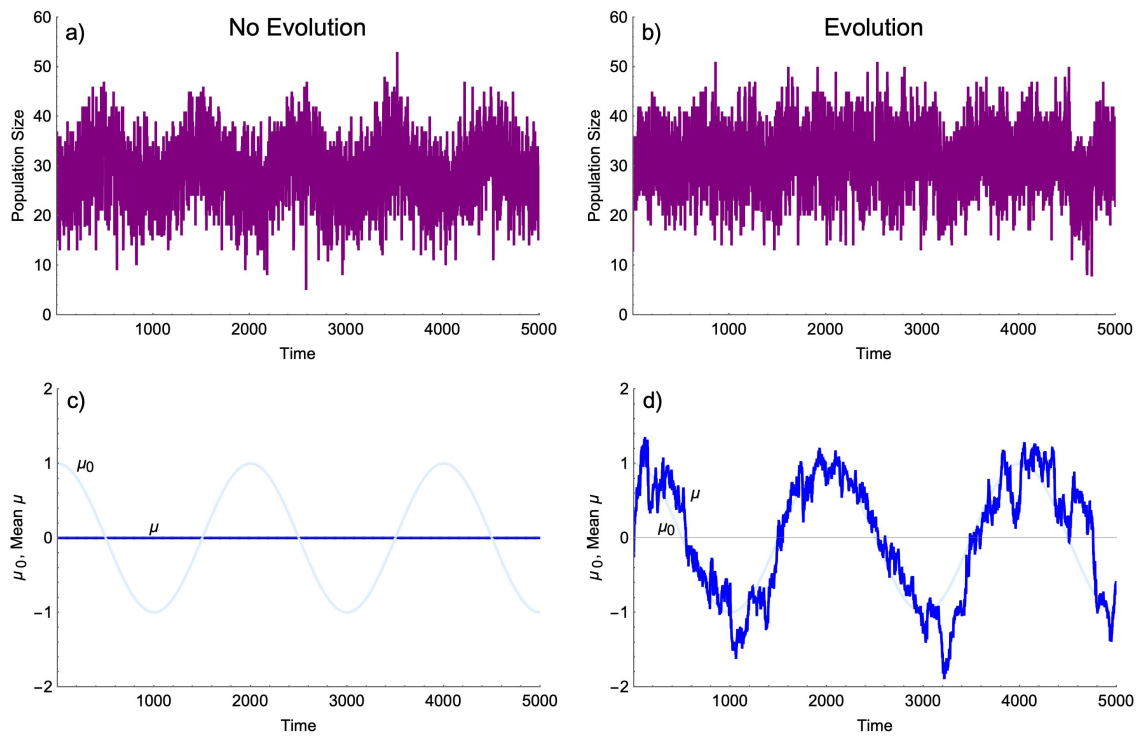

387

388 Figure 3. Ecological tracking occurs when the population size (a) exhibits a correlated  
389 pattern of variation with the environment (here  $\mu_0$ ) (panels a and c). In this example all  
390 individuals have the same trait value, there is no evolution, and  $f = 0.0005$ . Panels b and  
391 d show evolutionary tracking where the mean trait in the population closely follows the  
392 environment, thereby dampening the ecological response to the environmental variation.

393

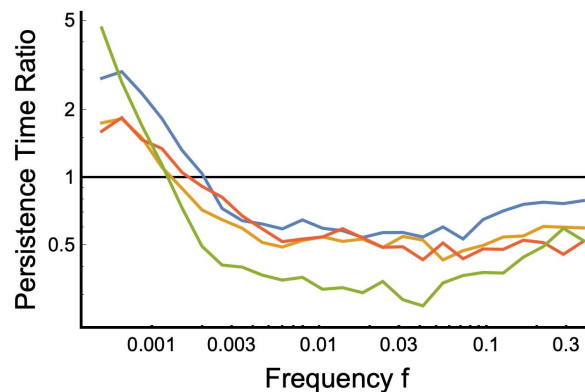

394

395 Figure 4. The quotient between the mean persistence time of populations that exhibited  
396 evolution and the mean persistence time of populations that did not undergo evolution. For  
397 values above one, evolution was beneficial for persistence, for those below one, evolution  
398 had a negative impact. Evolutionary tracking increased persistence time for populations  
399 when the environmental fluctuation frequency was low.

400

401 *Consequences of environmental effects on different demographic rates*

402 In natural populations we see that the demographic rates that are selected upon, and how  
403 density dependence responds varies. Some populations may respond to environmental  
404 change in a density independent way as in cases 1a, 2a (Dempster 1983; Brewer and Peltzer  
405 2009) while some are likely to show an increase in the intensity of density dependence as  
406 in cases 1b, 2b (Aanes et al. 2000; Coulson et al. 2001), with varied key demographic rates,  
407 (birth or death). These results emphasize the importance of taking specific demographic  
408 parameters into account into our models in the light of evolutionary rescue. Furthermore,  
409 these results suggest that environmental change that primarily causes an increase in  
410 mortality independent of density will be the most destructive to natural populations (Case  
411 2b). We see dynamics such as this when environmental changes drive populations to  
412 physiological limits, natural disasters, severe weather, and pollution. For example, a  
413 change in oxygen composition in a marine ecosystem may affect a population regardless  
414 of density (Brewer and Peltzer 2009), or an increase in heavy metal contamination may  
415 similarly increase mortality regardless of population size (Santala and Ryser 2009).

416

417 According to our results the populations that will benefit the most from evolutionary rescue  
418 will be those whose fecundity responds to an environmental change in a density dependent  
419 way. This may be exemplified in cases where the availability of, or access to resources  
420 diminishes or changes with environmental change. This leads to the malnutrition and lower  
421 fecundity of some individuals (Jaumann and Snell-Rood 2019) but importantly in this case,  
422 as the population size declines the effect of the environmental stress weakens. Note that  
423 density dependence can also decrease due to environmental change in areas where the  
424 change is favorable (take the case of invasive species and pests), further increasing  
425 persistence potential (Ouyang et al. 2014). From these results we recommend that long-  
426 term studies incorporate fine demographic data when feasible. Further analysis should be  
427 done to fine tune the relevant parameters that play a role in evolutionary rescue, so that we  
428 may one day be able to predict and promote evolutionary rescue in the wild.

429

#### 430 *Consequences of our model assumptions*

431 Our modeling framework assumes asexual reproduction and a link between the  
432 environment and demographic parameter that is controlled by a single trait. Most empirical  
433 and theoretical work suggests that sexual recombination leads to an increased rate of  
434 evolution, as it is beneficial when mutations are common and have a small effect size (Crow  
435 and Kimura 1965). Recombination can also pose the opposite effect by allowing  
436 maladaptive traits to persist longer in the population, leading to a greater genetic load on  
437 population fitness. Incorporating recombination to assess any differences in outcome will  
438 surely be relevant given the diversity of mating systems in nature. Furthermore, singular  
439 step mutations are what allow the population as a whole to track the changing environment,

440 as opposed to a genotype phenotype mapping that is not one to one. This may be  
441 representative of populations with a narrow genetic basis for which adaptation to the  
442 environment can occur, such as what has commonly been seen in drug resistance (MacLean  
443 et al. 2010). That being said, in nature some cases of environmental change will surely  
444 require multiple traits to evolve for the population to persist. The utility of this model  
445 though is that it is comparative, it is likely we will see the same trends in a multi-trait model  
446 but this will surely be fruitful to investigate as we bring our models towards realism. This  
447 will become even more relevant with the incorporation of species interactions. Competition  
448 can both inhibit and promote evolutionary rescue in different cases (Osmond and de  
449 Mazancourt 2013) and has shown to be a relevant component in the study of population  
450 persistence.

451

452 Lastly, the environment in this model lacks environmental stochasticity, which has been  
453 shown to play a role in the potential for populations to evolve to track the changing  
454 environment (Ovaskainen and Meerson 2010; Fey and Wiczyński 2017). But, because we  
455 utilize a fluctuating environment instead of the single step change commonly utilized in  
456 evolutionary rescue studies, we are able to characterize the ability for a population to  
457 continuously adapt to a changing environment. In this way we are able to see populations  
458 undergoing evolutionary rescue again and again, in order to better understand the  
459 mechanisms underlying this dynamic. In environments undergoing non-cyclic changes, the  
460 rate and extent of environmental change together form a critical axis on which the success  
461 of evolutionary rescue (or more appropriately eco-evolutionary rescue) can be measured.  
462 Generally, the potential for eco-evolutionary rescue is assessed using a singular

463 environmental change, e.g. from low to high concentrations of salt, or cold to warm  
464 temperatures, (Doebeli and Dieckmann 2003; Crump et al. 2004; McCain and Grytnes  
465 2010) and the typical pattern of population and trait dynamics are easily explained using  
466 the concepts of ecological and evolutionary tracking applied above; when traits are able to  
467 track the environmental change quickly enough, ecological changes are dampened enough  
468 to prevent extinction. Thus, our model, which incorporates a cyclic environmental change,  
469 is a useful predictor of how different assumptions about life history will alter the propensity  
470 of eco-evolutionary rescue. We confirm that our results are not an outcome of this cyclic  
471 environment, as the same persistence ranking results from a sinusoidal shift in the  
472 environment (Figure 5).

473

474 The study of evolutionary rescue has increased notably in the past decade, and although  
475 we have elucidated a reduced set of relevant factors, the interplay between demography  
476 and evolutionary rescue is still largely unknown. We show that models with varied  
477 dynamic demographic parameters with the same carrying capacities and initial conditions  
478 have different probabilities of undergoing evolutionary rescue following environmental  
479 change. Therefore, comparative evolutionary demography provides a lens with which we  
480 can understand how different populations may be more or less likely to persist alongside  
481 environmental change. As emphasized in previous studies, evolutionary rescue in these  
482 models occurs when the rate of environmental change, or the fluctuation frequency is slow  
483 enough for the population to evolutionarily track the changing trait optimum as shown in  
484 figure 3b,d (Perron et al. 2008; Lindsey et al. 2013). Although the current model does not  
485 take into account spatially heterogeneous environments or interspecific competition, it



486 provides a starting point to better understand the interplay between evolutionary  
487 demography and evolution to a changing environment. We find that changing the  
488 demographic parameter that selection acts on, as well as the way in which selection alters  
489 density dependence, changes a populations propensity to avoid extinction via evolutionary  
490 rescue.

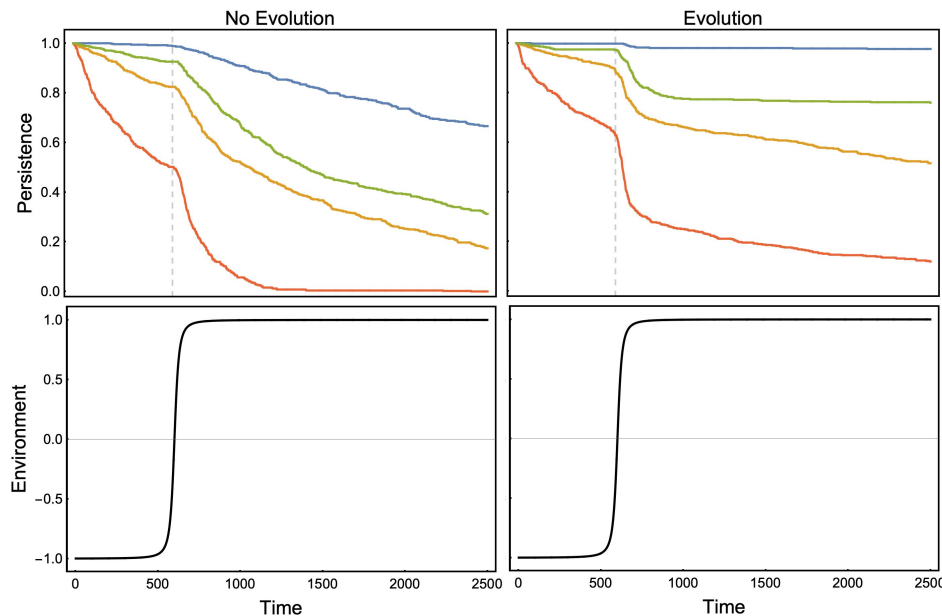

491

492 Figure 5. The proportion of persisting populations over time. These plots portray a typical  
493 evolutionary rescue scenario with a sigmoidal environment. The top panels depict the  
494 proportion of surviving populations over time out of 512 replicates for case 1a (green), 1b  
495 (blue), 2a (red), and 2b (yellow).

496

### 497 **Conclusion**

498 We show that when evolution is occurring in a system, the extinction probabilities vary  
499 given different dynamic demographic parameters. This work is the first to show that  
500 populations whose abundance is determined by changes in different key demographic

501 rates have different probabilities to avoid climate-induced extinction via evolution. This  
502 comes into play in how well a population can evolve to have high fitness in a changing  
503 environment, and the ability of a population to rebound from small population sizes. Our  
504 findings show the importance of explicitly incorporating environmental change and  
505 density dependence into equations describing population demographic rates. In our study  
506 the environment provides the selective pressure on individuals, and unlike in previous  
507 work the shape of this selective pressure is shown to differ between commonly used  
508 models. This result would not have been shown had we focused on a purely ecological or  
509 evolutionary model, this interplay is what allows us to make novel insights into if and  
510 how population persistence will be altered by climate change. Furthermore, incorporating  
511 selection and trait evolution into models on ecological time scales is an important  
512 research priority. This work shows that natural populations that have different key  
513 demographic rates will likely respond differently to climate change, and this information  
514 should be explicitly incorporated into models that predict extinction due to climate  
515 change.

516

517 In order to minimize extinction of natural populations alongside changing environmental  
518 conditions such as climate change, we must be able to make decisions without complete  
519 data describing future phenomena. It is therefore vital to create theory that can aid  
520 scientists and wildlife managers alike in understanding how natural populations respond  
521 to escalating rates of environmental challenge. This includes techniques utilizing the  
522 population data we already have, to use the past as a proxy for the future, as well as  
523 techniques utilizing our understanding of evolution to form ideas of how populations can

524 adapt and how we can help them to adapt to persist into the future. Our current lack of  
525 understanding of the combined effect of ecological and evolutionary dynamics on the  
526 outcome of climate change, poses a challenge to produce theoretical and experimental  
527 work investigating these mechanisms. Already scientists are corroborating theoretical  
528 hypotheses with experimental results for concepts such as rate of environmental change,  
529 initial population size, and genetic variability (Bell and Gonzalez 2009, 2011; Martin et  
530 al. 2013). The results provided in this study provide us with new testable hypotheses that  
531 we can test utilizing experimental evolution. The comparative framework we've  
532 established allows us to test the probability of population rebound post decline due to  
533 environmental change between populations whose demography responds differently.

534

535 It is clear that in order to assess a population's propensity for evolutionary rescue, we must  
536 pay attention to the specific life history parameters that determine population size both  
537 with and without environmental change. That is, what is the key factor that determines  
538 population size, what role density dependence plays and how environmental change alters  
539 the vital rates and their response to density (Coulson et al. 2008). The way that the  
540 environment alters population vital rates and response to density in predictive models is  
541 often simplified in the literature when using data driven frameworks that predict  
542 population size based on current habitat (Guisan and Zimmermann 2000; VanDerWal et  
543 al. 2009; Thuiller et al. 2014), and theoretical frameworks where the environmental  
544 change acts on  $r$  directly (Vasseur et al. 2011; Cropp and Norbury 2019). This can  
545 conceal population response to environmental change as  $r$  is an aggregate of many

546 processes (fecundity, mortality, dispersal etc) that may respond differently to  
547 environmental change.

548

549 **Literature Cited**

- 550 Aanes, R., B.-E. Sæther, and N. A. Øritsland. 2000. Fluctuations of an introduced  
551 population of Svalbard reindeer: the effects of density dependence and climatic  
552 variation. *Ecography* 23:437–443.
- 553 Agashe, D., J. J. Falk, and D. I. Bolnick. 2011. Effects of Founding Genetic Variation on  
554 Adaptation to a Novel Resource. *Evolution* 65:2481–2491.
- 555 Bell, G., and A. Gonzalez. 2011. Adaptation and evolutionary rescue in metapopulations  
556 experiencing environmental deterioration. *Science* 332:1327–1330.
- 557 Bell, G., and A. Gonzalez. 2009. Evolutionary rescue can prevent extinction following  
558 environmental change. *Ecol. Lett.* 12:942–948.
- 559 Brewer, P. G., and E. T. Peltzer. 2009. Limits to Marine Life. *Science* 324:347–348.
- 560 Brown, J. H., and A. Kodric-Brown. 1977. Turnover Rates in Insular Biogeography:  
561 Effect of Immigration on Extinction. *Ecology* 58:445–449.
- 562 Caswell, H., M. Fujiwara, and S. Brault. 1999. Declining survival probability threatens  
563 the North Atlantic right whale. *PNAS* 96:3308–3313.
- 564 Clutton-Brock, T. H., and T. Coulson. 2002. Comparative ungulate dynamics: the devil is  
565 in the detail. *Philos Trans R Soc Lond B Biol Sci* 357:1285–1298.
- 566 Coulson, T., E. A. Catchpole, S. D. Albon, B. J. Morgan, J. M. Pemberton, T. H. Clutton-  
567 Brock, M. J. Crawley, and B. T. Grenfell. 2001. Age, sex, density, winter  
568 weather, and population crashes in Soay sheep. *Science* 292:1528–1531.

- 569 Coulson, T., T. H. G. Ezard, F. Pelletier, G. Tavecchia, N. C. Stenseth, D. Z. Childs, J. G.  
570 Pilkington, J. M. Pemberton, L. E. B. Kruuk, T. H. Clutton-Brock, and M. J.  
571 Crawley. 2008. Estimating the functional form for the density dependence from  
572 life history data. *Ecology* 89:1661–1674.
- 573 Cropp, R., and J. Norbury. 2019. An eco-evolutionary system with naturally bounded  
574 traits. *Theor Ecol*, doi: 10.1007/s12080-019-0407-6.
- 575 Crow, J. F., and M. Kimura. 1965. Evolution in Sexual and Asexual Populations. *The*  
576 *American Naturalist* 99:439–450.
- 577 Crump, B. C., C. S. Hopkinson, M. L. Sogin, and J. E. Hobbie. 2004. Microbial  
578 Biogeography along an Estuarine Salinity Gradient: Combined Influences of  
579 Bacterial Growth and Residence Time. *Appl. Environ. Microbiol.* 70:1494–1505.
- 580 Dempster, J. P. 1983. The Natural Control of Populations of Butterflies and Moths.  
581 *Biological Reviews* 58:461–481.
- 582 Doebeli, M., and U. Dieckmann. 2003. Speciation along environmental gradients. *Nature*  
583 421:259–264.
- 584 Ferguson, J. M., and J. M. Ponciano. 2015. Evidence and implications of higher-order  
585 scaling in the environmental variation of animal population growth. *PNAS*  
586 201416538.
- 587 Fey, S. B., and D. J. Wieczynski. 2017. The temporal structure of the environment may  
588 influence range expansions during climate warming. *Glob Chang Biol* 23:635–  
589 645.
- 590 Gillespie, D. T. 1977. Exact stochastic simulation of coupled chemical reactions. *J. Phys.*  
591 *Chem.* 81:2340–2361.

- 592 Gomulkiewicz, R., and R. D. Holt. 1995. When does Evolution by Natural Selection  
593 Prevent Extinction? *Evolution* 49:201–207.
- 594 Gonzalez, A., O. Ronce, R. Ferriere, and M. E. Hochberg. 2013. Evolutionary rescue: an  
595 emerging focus at the intersection between ecology and evolution. *Philos Trans R*  
596 *Soc Lond B Biol Sci* 368.
- 597 Guisan, A., and N. E. Zimmermann. 2000. Predictive habitat distribution models in  
598 ecology. *Ecological Modelling* 135:147–186.
- 599 Heino, M., J. Ripa, and V. Kaitala. 2000. Extinction risk under coloured environmental  
600 noise. *Ecography* 23:177–184.
- 601 Higgins, K., and M. Lynch. 2001. Metapopulation extinction caused by mutation  
602 accumulation. *PNAS* 98:2928–2933.
- 603 Holt, R. D. 1990. The microevolutionary consequences of climate change. *Trends in*  
604 *Ecology & Evolution* 5:311–315.
- 605 Hufbauer, R. A., M. Szűcs, E. Kasyon, C. Youngberg, M. J. Koontz, C. Richards, T.  
606 Tuff, and B. A. Melbourne. 2015. Three types of rescue can avert extinction in a  
607 changing environment. *Proceedings of the National Academy of Sciences*  
608 112:10557–10562.
- 609 Jaumann, S., and E. C. Snell-Rood. 2019. Adult nutritional stress decreases oviposition  
610 choosiness and fecundity in female butterflies. *Behavioral Ecology*, doi:  
611 10.1093/beheco/arz022.
- 612 Johannesson, K., K. Smolarz, M. Grahn, and C. André. 2011. The future of Baltic Sea  
613 populations: local extinction or evolutionary rescue? *Ambio* 40:179–190.

- 614 Jonsson, A., and B. Ebenman. 2001. Are Certain Life Histories Particularly Prone to  
615 Local Extinction? *Journal of Theoretical Biology* 209:455–463.
- 616 Jonsson, A., and U. Wennergren. 2019. Approximations of population growth in a noisy  
617 environment: on the dichotomy of non-age and age structure. *Theor Ecol* 12:99–  
618 110.
- 619 Lande, R. 1988. Demographic Models of the Northern Spotted Owl (*Strix occidentalis*  
620 *caurina*). *Oecologia* 75:601–607.
- 621 Lande, R. 1993. Risks of Population Extinction from Demographic and Environmental  
622 Stochasticity and Random Catastrophes. *The American Naturalist* 142:911–927.
- 623 Lande, R., and S. H. Orzack. 1988. Extinction dynamics of age-structured populations in  
624 a fluctuating environment. *Proc. Natl. Acad. Sci. U.S.A.* 85:7418–7421.
- 625 Leigh, E. G. 1981. The average lifetime of a population in a varying environment.  
626 *Journal of Theoretical Biology* 90:213–239.
- 627 Lindsey, H. A., J. Gallie, S. Taylor, and B. Kerr. 2013. Evolutionary rescue from  
628 extinction is contingent on a lower rate of environmental change. *Nature*  
629 494:463–467.
- 630 MacLean, R. C., A. R. Hall, G. G. Perron, and A. Buckling. 2010. The population  
631 genetics of antibiotic resistance: integrating molecular mechanisms and treatment  
632 contexts. *Nat. Rev. Genet.* 11:405–414.
- 633 Martin, G., R. Aguilée, J. Ramsayer, O. Kaltz, and O. Ronce. 2013. The probability of  
634 evolutionary rescue: towards a quantitative comparison between theory and  
635 evolution experiments. *Philos. Trans. R. Soc. Lond., B, Biol. Sci.* 368:20120088.

- 636 May, R. M. 1973. Stability in Randomly Fluctuating Versus Deterministic Environments.  
637 The American Naturalist 107:621–650.
- 638 May, R. M. 1976. Theoretical Ecology, principles and applications. Blackwell Scientific,  
639 Oxford.
- 640 McCain, C. M., and J.-A. Grytnes. 2010. Elevational Gradients in Species Richness. P. *in*  
641 eLS. American Cancer Society.
- 642 Mccredie, M. R., A. R. Malcolm, B. W. Fred, and K. J. F. Charles. 1983. Epidemiology  
643 and genetics in the coevolution of parasites and hosts. Proceedings of the Royal  
644 Society of London. Series B. Biological Sciences 219:281–313.
- 645 Melbourne, B. A., and A. Hastings. 2008. Extinction risk depends strongly on factors  
646 contributing to stochasticity. Nature 454:100–103.
- 647 Mills, L. S., E. V. Bragina, A. V. Kumar, M. Zimova, D. J. R. Lafferty, J. Feltner, B. M.  
648 Davis, K. Hackländer, P. C. Alves, J. M. Good, J. Melo-Ferreira, A. Dietz, A. V.  
649 Abramov, N. Lopatina, and K. Fay. 2018. Winter color polymorphisms identify  
650 global hot spots for evolutionary rescue from climate change. Science 359:1033–  
651 1036.
- 652 Nåsell, I. 2001. Extinction and Quasi-stationarity in the Verhulst Logistic Model. Journal  
653 of Theoretical Biology 211:11–27.
- 654 Nåsell, I. 1996. The quasi-stationary distribution of the closed endemic sis model.  
655 Advances in Applied Probability 28:895–932.
- 656 Nisbet, R. M., and W. Gurney. 2003. Modelling fluctuating populations : reprint of first  
657 Edition (1982). Blackburn Press.



- 658 Orr, H. A., and R. L. Unckless. 2008. Population extinction and the genetics of  
659 adaptation. *Am. Nat.* 172:160–169.
- 660 Osmond, M. M., and C. de Mazancourt. 2013. How competition affects evolutionary  
661 rescue. *Philosophical Transactions of the Royal Society B: Biological Sciences*  
662 368:20120085.
- 663 Ouyang, F., C. Hui, S. Ge, X.-Y. Men, Z.-H. Zhao, P.-J. Shi, Y.-S. Zhang, and B.-L. Li.  
664 2014. Weakening density dependence from climate change and agricultural  
665 intensification triggers pest outbreaks: a 37-year observation of cotton bollworms.  
666 *Ecol Evol* 4:3362–3374.
- 667 Ovaskainen, O., and B. Meerson. 2010. Stochastic models of population extinction.  
668 *Trends in Ecology & Evolution* 25:643–652.
- 669 Owen-smith, N. 1990. Demography of a Large Herbivore, the Greater Kudu *Tragelaphus*  
670 *strepsiceros*, in Relation to Rainfall. *Journal of Animal Ecology* 59:893–913.
- 671 Palamara, G. M., F. Carrara, M. J. Smith, and O. L. Petchey. 2016. The effects of  
672 demographic stochasticity and parameter uncertainty on predicting the  
673 establishment of introduced species. *Ecol Evol* 6:8440–8451.
- 674 Perron, G. G., A. Gonzalez, and A. Buckling. 2008. The rate of environmental change  
675 drives adaptation to an antibiotic sink. *Journal of Evolutionary Biology* 21:1724–  
676 1731.
- 677 Ramsayer, J., O. Kaltz, and M. E. Hochberg. 2013. Evolutionary rescue in populations of  
678 *Pseudomonas fluorescens* across an antibiotic gradient. *Evol Appl* 6:608–616.
- 679 Reed, A. W., and N. A. Slade. 2008. Density-dependent recruitment in grassland small  
680 mammals. *Journal of Animal Ecology* 77:57–65.

- 681 Santala, K. R., and P. Ryser. 2009. Influence of heavy-metal contamination on plant  
682 response to water availability in white birch, *Betula papyrifera*. *Environmental*  
683 *and Experimental Botany* 66:334–340.
- 684 Schwager, M., K. Johst, and F. Jeltsch. 2006. Does red noise increase or decrease  
685 extinction risk? Single extreme events versus series of unfavorable conditions.  
686 *The American Naturalist* 167:879–888.
- 687 Sibly, R. M., D. Barker, M. C. Denham, J. Hone, and M. Pagel. 2005. On the Regulation  
688 of Populations of Mammals, Birds, Fish, and Insects. *Science* 309:607–610.
- 689 Sibly, R. M., T. D. Williams, and M. B. Jones. 2000. How environmental stress affects  
690 density dependence and carrying capacity in a marine copepod. *Journal of*  
691 *Applied Ecology* 37:388–397.
- 692 Thuiller, W., T. Münkemüller, K. H. Schiffers, D. Georges, S. Dullinger, V. M. Eckhart,  
693 T. C. Edwards, D. Gravel, G. Kunstler, C. Merow, K. Moore, C. Piedallu, S.  
694 Vissault, N. E. Zimmermann, D. Zurell, and F. M. Schurr. 2014. Does probability  
695 of occurrence relate to population dynamics? *Ecography* 37:1155–1166.
- 696 VanDerWal, J., L. P. Shoo, C. N. Johnson, and S. E. Williams. 2009. Abundance and the  
697 Environmental Niche: Environmental Suitability Estimated from Niche Models  
698 Predicts the Upper Limit of Local Abundance. *The American Naturalist* 174:282–  
699 291.
- 700 Vasseur, D. A. 2007. Assessing the impact of environmental variability on trophic  
701 systems using an allometric frequency-resolved approach. Pp. 41–60 *in* *The*  
702 *Impact of Environmental Variability on Ecological Systems*. Springer.

- 703 Vasseur, D. A., P. Amarasekare, V. H. W. Rudolf, and J. M. Levine. 2011. Eco-  
704 Evolutionary dynamics enable coexistence via neighbor-dependent selection. *Am.*  
705 *Nat.* 178:E96–E109.
- 706 Whiteley, A. R., S. W. Fitzpatrick, W. C. Funk, and D. A. Tallmon. 2015. Genetic rescue  
707 to the rescue. *Trends in Ecology & Evolution* 30:42–49.
- 708 Zhang, Q.-G., and A. Buckling. 2011. Antagonistic coevolution limits population  
709 persistence of a virus in a thermally deteriorating environment. *Ecology Letters*  
710 14:282–288.
- 711
